# Supplementary material for: Influence of Area, Age and Sex on Per- and Polyfluorinated Alkyl Substances Detected in Roe Deer Muscle and Liver from Selected Areas of Northern Italy
Source: MDPI journal article supplement (doi:10.3390/ani14040529), 2024-02-06
Supplement: s1 [file s1]

**Figure S1:** Age classes and their distribution. Estimated age is expressed in in months for animals < 2 y.o. and in years for animals > 2 y.o.

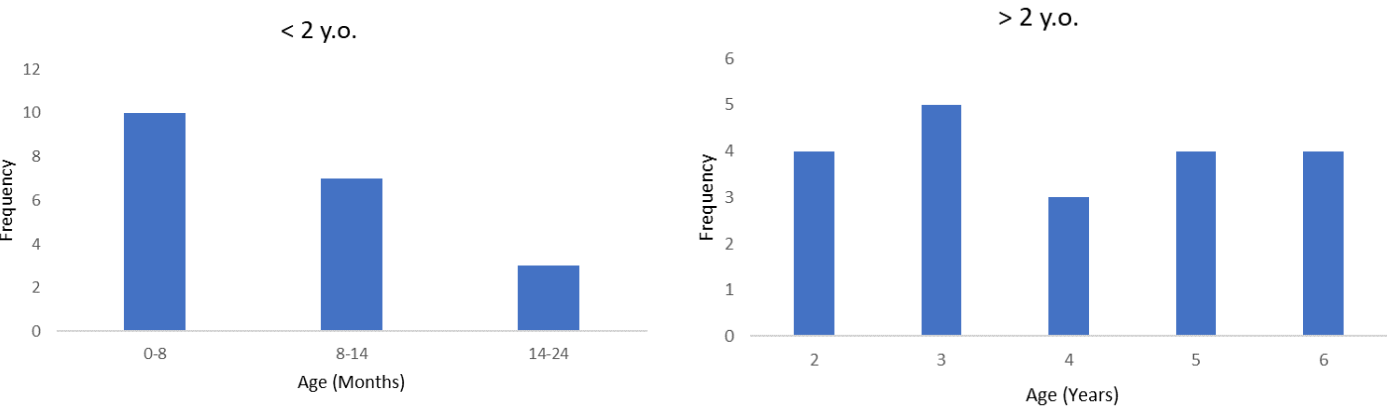

**Table S1:** Validation parameters of UPLC-HRMS analysis and instrumental parameters information.

| Compound   | Formula      | Parent<br>Exact Mass<br>m/z | RT<br>(min) | LOD (pg/g) | LOQ<br>(pg/g) | Linearity              | R <sup>2</sup> | Recovery<br>(%) | Matrix<br>Effect<br>(%) | CV<br>Intraday<br>(%) | CV<br>Interday<br>(%) |
|------------|--------------|-----------------------------|-------------|------------|---------------|------------------------|----------------|-----------------|-------------------------|-----------------------|-----------------------|
| PFBA       | C4HF7O2      | 213                         | 3.71        | 0.615116   | 1.863989      | $y = 0.0706x + 0.0067$ | 0.978          | 108             | 83                      | 11                    | 19                    |
| PFPeA      | C5HF9O       | 263                         | 9.64        | 0.402452   | 1.219553      | $y = 1.1245x - 0.0501$ | 0.979          | 101             | 82                      | 12                    | 15                    |
| PFHxA      | C6HF11O2     | 313                         | 13.37       | 2.715292   | 8.228159      | $y = 0.1497x + 0.0012$ | 0.999          | 98              | 100                     | 10                    | 18                    |
| PFHpA      | C7HF13O2     | 363                         | 15.53       | 0.247166   | 0.748987      | $y = 0.1842x + 0.0014$ | 0.999          | 89              | 109                     | 10                    | 16                    |
| PFOA       | C8HF15O2     | 413                         | 17.05       | 0.456216   | 1.382472      | $y = 0.2022x - 0.0061$ | 0.999          | 97              | 85                      | 11                    | 17                    |
| PFNA       | C9HF17O2     | 463                         | 18.27       | 1.680316   | 5.091868      | $y = 0.1088x + 0.0004$ | 0.999          | 101             | 102                     | 12                    | 20                    |
| PFDA       | C10HF19O2    | 513                         | 21.92       | 0.208077   | 0.630537      | $y = 0.1674x - 0.005$  | 0.972          | 106             | 99                      | 11                    | 15                    |
| FOUEA      | C10H2F16O    | 457                         | 18.73       | 0.8751     | 2.651818      | $y = 0.0384x - 0.0001$ | 0.998          | 100             | 105                     | 13                    | 17                    |
| NaDONA     | C7HF12NaO4   | 377                         | 15.75       | 0.166717   | 0.505202      | $y = 0.2671x + 0.003$  | 0.997          | 102             | 116                     | 14                    | 20                    |
| PFBS       | C4HF9O3S     | 299                         | 10.90       | 6.925848   | 20.98742      | $y = 0.3081x + 0.0037$ | 0.999          | 98              | 90                      | 9                     | 16                    |
| PFHxS      | C6HF13O3S    | 399                         | 15.67       | 0.242975   | 0.736289      | $y = 0.2344 + 0.0072$  | 0.976          | 103             | 114                     | 12                    | 20                    |
| PFOS       | C8HF17O3S    | 499                         | 18.24       | 0.47006    | 1.424425      | $y = 0.1144x + 0.0021$ | 0.999          | 97              | 101                     | 11                    | 18                    |
| FOSA       | C8H2F17NO2S  | 498                         | 20.60       | 2.102951   | 6.37258       | $y = 0.0494x - 0.0006$ | 0.985          | 100             | 89                      | 10                    | 18                    |
| 6-2FTS     | C8H5F13O3S   | 427                         | 16.96       | 0.401824   | 1.217649      | $y = 0.0628x + 0.0018$ | 0.980          | 99              | 95                      | 10                    | 15                    |
| 8-2FTS     | C10H4F17O3S  | 527                         | 21.15       | 0.433713   | 1.314282      | $y = 0.1068x - 5E-05$  | 0.999          | 97              | 100                     | 12                    | 17                    |
| N-MetFOSAA | C11H6F17NO4S | 570                         | 19.91       | 1.293974   | 3.921134      | $y = 88.766x + 0.0157$ | 0.999          | 103             | 96                      | 9                     | 18                    |

#### Instrumental parameters used for UPLC-HRMS

All PFASs were chromatographically separated by using a Raptor ARC-18 5  $\mu$ m EXP guard column (Restek, Bellefonte, PA, USA). Moreover, a CMB WR C18 50  $\times$  4.6 mm, 10  $\mu$ m (PerkinElmer Italia SPA, Milan, Italy), was introduced before the injector to allow delaying of eventual PFASs already present in the system. The mobile phase consisted of phase A (20 mM aqueous ammonium formate) and B (MeOH). The gradient started with 20% B, which reached 95% B at the 20th min and was kept in this condition for 10 min. At the 30th minute, the initial conditions (20% B) were reached and kept for 4 min for riequilibration. The run was performed at 0.3 mL min<sup>-1</sup>, with a total duration of 35 min. Regarding the detector parameters, the capillary and vaporizer temperatures were set at 330 and 280 °C, respectively, the sheath and auxiliary gas were set at 5 and 15 arbitrary units, and the electrospray voltage was set at 3.50 kV, operating in negative mode. The full scan (FS) acquisition (70,000 FWHM resolution, scan range 200–950 m/z, 1E6 of automatic gain control AGC, maximum injection time of 200 ms) was combined with a data-independent acquisition (DIA) mode for the confirmatory response, based on an inclusion list that operated at 35,000 FWHM resolution, 5E4 AGC target, maximum injection time of 100 ms, and isolation window of 2 m/z.

**Table S2:** Concentrations of PFASs in liver and muscle tissue and comparison between matrices obtained from roe deer from Oltrepò Pavese, Italy. Data are reported in  $\mu\text{g}\cdot\text{kg}^{-1}$ , detection frequencies (concentration > LOQ) are reported in %.

|        | Matrix | Mean $\pm$ SD         | Min-Max     | Percentile |          |       | DF%  | pvalue |
|--------|--------|-----------------------|-------------|------------|----------|-------|------|--------|
|        |        |                       |             | 25th       | Median   | 75th  |      |        |
| PFBA   | Meat   | 0.051 $\pm$ 0.119     | 0-0.679     | 0          | 0        | 0.051 | 40   | >0,05  |
|        | Liver  | 0.018 $\pm$ 0.038     | 0-0.170     | 0          | 0        | 0.002 | 25   |        |
| PFPeA  | Meat   | 0.026 $\pm$ 0.032     | 0-0.108     | 0          | 0        | 0.058 | 42.5 | >0.05  |
|        | Liver  | 0.015 $\pm$ 0.027     | 0-0.068     | 0          | 0        | 0.015 | 25   |        |
| PFHxA  | Meat   | N.D.                  |             | 0          | 0        | 0     | 0    |        |
|        | Liver  | N.D.                  |             | 0          | 0        | 0     | 0    |        |
| PFHxA  | Meat   | 0.065 $\pm$ 0.115     | 0-0.302     | 0          | 0        | 0.047 | 25   | >0.05  |
|        | Liver  | 0.079 $\pm$ 0.148     | 0-0.697     | 0          | 0        | 0.197 | 35   |        |
| PFOA   | Meat   | 0.069 $\pm$ 0.101     | 0-0.254     | 0          | 0        | 0.178 | 40   | >0.05  |
|        | Liver  | 0.156 $\pm$ 0.323     | 0-1.844     | 0          | 0.073    | 0.211 | 70   |        |
| PFNA   | Meat   | 0.082 $\pm$ 0.142     | 0-0.355     | 0          | 0.002    | 0.051 | 50   | <0.001 |
|        | Liver  | 0.366 $\pm$ 0.277     | 0-1         | 0.146      | 0.373    | 0.550 | 95   |        |
| PFDA   | Meat   | 0.007 $\pm$ 0.013     | 0-0.032     | 0          | 0        | 0.007 | 25   | >0.05  |
|        | Liver  | 0.006 $\pm$ 0.012     | 0-0.031     | 0          | 0        | 0     | 20   |        |
| FOUEA  | Meat   | N.D.                  | 0           | 0          | 0        | 0     |      |        |
|        | Liver  | N.D.                  | 0           | 0          | 0        | 0     |      |        |
| NADONA | Meat   | N.D.                  | 0           | 0          | 0        | 0     |      |        |
|        | Liver  | N.D.                  | 0           | 0          | 0        | 0     |      |        |
| PFBS   | Meat   | 0.065 $\pm$ 0.118     | 0-0.355     | 0          | 0        | 0.034 | 25   | >0.05  |
|        | Liver  | 0.081 $\pm$ 0.152     | 0-0.612     | 0          | 0        | 0.064 | 27.5 |        |
| PFHxS  | Meat   | 0.06135 $\pm$ 0.11033 | 0-0.318     | 0          | 0        | 0.035 | 25   | >0.05  |
|        | Liver  | 0.09445 $\pm$ 0.16312 | 0-0.5538    | 0          | 0        | 0.213 | 30   |        |
| PFOS   | Meat   | 0.2961 $\pm$ 0.751    | 0-8.019     | 0          | 0        | 0.277 | 47.5 | <0.001 |
|        | Liver  | 0.666 $\pm$ 0.635     | 0.114-3.941 | 0.351      | 0.526    | 0.782 | 100  |        |
| FOSA   | Meat   | 0.003 $\pm$ 0.006     | 0-0.019     | 0          | 0        | 0     | 22.5 | <0.05  |
|        | Liver  | N.D.                  | 0           | 0          | 0        | 0     |      |        |
| 6-2FTS | Meat   | 0.037 $\pm$ 0.0704    | 0-0.274     | 0          | 0        | 0.026 | 42.5 | >0.05  |
|        | Liver  | 0.033 $\pm$ 0.071     | 0-0.335     | 0          | 0        | 0.033 | 47.5 |        |
| 8-2FTS | Meat   | 0.043 $\pm$ 0.063     | 0-0.213     | 0          | 7.05E-05 | 0.045 | 50   | >0.05  |
|        | Liver  | 0.049 $\pm$ 0.077     | 0-0.359     | 0          | 0.013    | 0.065 | 50   |        |

**Table S3:** PFASs detected in liver of roe deer, comparison between urbanized and rural area. Data are reported in  $\mu\text{g}\cdot\text{kg}^{-1}$ ; Detection frequencies (DF%): number of samples > LOQ.

|                | Area      | Mean $\pm$ SD     | Min - Max     | Percentiles |        |       | DF % | p-value |
|----------------|-----------|-------------------|---------------|-------------|--------|-------|------|---------|
|                |           |                   |               | 25th        | Median | 75th  |      |         |
| <b>PFBA</b>    | Urbanized | 0.025 $\pm$ 0.044 | 0 - 0.17      | 0           | 0      | 0.059 | 15   | >0.05   |
|                | Rural     | 0.013 $\pm$ 0.033 | 0 - 0.119     | 0           | 0      | 0     | 35   |         |
| <b>PFPeA</b>   | Urbanized | 0.022 $\pm$ 0.031 | 0 - 0.068     | 0           | 0      | 0.062 | 15   | >0.05   |
|                | Rural     | 0.010 $\pm$ 0.024 | 0 - 0.064     | 0           | 0      | 0     | 35   |         |
| <b>PFHpA</b>   | Urbanized | 0.123 $\pm$ 0.183 | 0 - 0.697     | 0           | 0      | 0.237 | 25   | >0.05   |
|                | Rural     | 0.038 $\pm$ 0.087 | 0 - 0.254     | 0           | 0      | 0.003 | 45   |         |
| <b>PFOA</b>    | Urbanized | 0.380 $\pm$ 0.11  | 0 - 0.250     | 0.014       | 0.156  | 0.213 | 60   | >0.05   |
|                | Rural     | 0.164 $\pm$ 0.427 | 0 - 1.844     | 0           | 0.018  | 0.142 | 75   |         |
| <b>PFNA</b>    | Urbanized | 0.445 $\pm$ 0.276 | 0 - 0.859     | 0.180       | 0.383  | 0.534 | 100  | >0.05   |
|                | Rural     | 0.387 $\pm$ 0.365 | 0.037 - 1     | 0.156       | 0.379  | 0.614 | 85   |         |
| <b>PFDA</b>    | Urbanized | 0.006 $\pm$ 0.012 | 0 - 0.031     | 0           | 0      | 0     | 20   | >0.05   |
|                | Rural     | 0.005 $\pm$ 0.011 | 0 - 0.032     | 0           | 0      | 0     | 20   |         |
| <b>PFBS</b>    | Urbanized | 0.119 $\pm$ 0.180 | 0 - 0.612     | 0           | 0      | 0.267 | 20   | >0.05   |
|                | Rural     | 0.048 $\pm$ 0.113 | 0 - 0.378     | 0           | 0      | 0     | 40   |         |
| <b>PFHxS</b>   | Urbanized | 0.128 $\pm$ 0.186 | 0 - 0.553     | 0           | 0      | 0.300 | 20   | >0.05   |
|                | Rural     | 0.066 $\pm$ 0.136 | 0 - 0.460     | 0           | 0      | 0     | 40   |         |
| <b>PFOS</b>    | Urbanized | 0.786 $\pm$ 0.406 | 0.114 - 8.019 | 0.332       | 0.535  | 0.719 | 100  | >0.05   |
|                | Rural     | 0.596 $\pm$ 0.839 | 0.264 - 3.940 | 0.358       | 0.549  | 0.929 | 100  |         |
| <b>6-2 FTS</b> | Urbanized | 0.042 $\pm$ 0.064 | 0 - 0.291     | 0           | 0.007  | 0.032 | 45   | >0.05   |
|                | Rural     | 0.028 $\pm$ 0.082 | 0 - 0.335     | 0           | 0.008  | 0.034 | 50   |         |
| <b>8-2 FTS</b> | Urbanized | 0.065 $\pm$ 0.059 | 0 - 0.25      | 0           | 0.017  | 0.053 | 50   | >0.05   |
|                | Rural     | 0.039 $\pm$ 0.095 | 0 - 0.359     | 0           | 0.035  | 0.083 | 50   |         |

**Table S4:** PFASs detected in muscle of roe deer, comparison between urbanized and rural area. Data are reported in  $\mu\text{g}\cdot\text{kg}^{-1}$ ; Detection frequencies (DF%): number of samples > LOQ.

|                | Area      | Mean $\pm$ SD     | Min -<br>Max | Percentiles |          |       | DF% | p-value |
|----------------|-----------|-------------------|--------------|-------------|----------|-------|-----|---------|
|                |           |                   |              | 25th        | Median   | 75th  |     |         |
| <b>PFBA</b>    | Urbanized | 0.070 $\pm$ 0.153 | 0 - 0.679    | 0           | 0        | 0.091 | 35  | > 0.05  |
|                | Rural     | 0.034 $\pm$ 0.071 | 0 - 0.277    | 0           | 0        | 0.031 | 45  |         |
| <b>PFPeA</b>   | Urbanized | 0.036 $\pm$ 0.036 | 0 - 0.108    | 0           | 0        | 0.065 | 35  | > 0.05  |
|                | Rural     | 0.021 $\pm$ 0.027 | 0 - 0.068    | 0           | 0        | 0.044 | 45  |         |
| <b>PFHpA</b>   | Urbanized | 0.095 $\pm$ 0.133 | 0 - 0.302    | 0           | 0        | 0.253 | 15  | > 0.05  |
|                | Rural     | 0.039 $\pm$ 0.092 | 0 - 0.278    | 0           | 0        | 0     | 35  |         |
| <b>PFOA</b>    | Urbanized | 0.095 $\pm$ 0.109 | 0 - 0.255    | 0           | 0.039    | 0.205 | 25  | > 0.05  |
|                | Rural     | 0.048 $\pm$ 0.089 | 0 - 0.254    | 0           | 0        | 0.054 | 55  |         |
| <b>PFNA</b>    | Urbanized | 0.166 $\pm$ 0.290 | 0 - 0.355    | 0           | 0.004    | 0.334 | 55  | > 0.05  |
|                | Rural     | 0.063 $\pm$ 0.129 | 0 - 0.356    | 0           | 8.40E-04 | 0.02  | 65  |         |
| <b>PFDA</b>    | Urbanized | 0.011 $\pm$ 0.014 | 0 - 0.031    | 0           | 0        | 0.029 | 15  | > 0.05  |
|                | Rural     | 0.005 $\pm$ 0.011 | 0 - 0.032    | 0           | 0        | 0     | 35  |         |
| <b>PFBS</b>    | Urbanized | 0.096 $\pm$ 0.138 | 0 - 0.355    | 0           | 0        | 0.227 | 30  | > 0.05  |
|                | Rural     | 0.038 $\pm$ 0.091 | 0 - 0.295    | 0           | 0        | 0.003 | 35  |         |
| <b>PFHxS</b>   | Urbanized | 0.091 $\pm$ 0.129 | 0 - 0.317    | 0           | 0        | 0.245 | 15  | > 0.05  |
|                | Rural     | 0.034 $\pm$ 0.082 | 0 - 0.276    | 0           | 0        | 0     | 35  |         |
| <b>PFOS</b>    | Urbanized | 0.522 $\pm$ 1.772 | 0 - 8.019    | 0           | 0        | 0.354 | 50  | > 0.05  |
|                | Rural     | 0.077 $\pm$ 0.153 | 0 - 0.484    | 0           | 0.003    | 0.03  | 45  |         |
| <b>FOSA</b>    | Urbanized | 0.005 $\pm$ 0.007 | 0 - 0.019    | 0           | 0        | 0.014 | 15  | > 0.05  |
|                | Rural     | 0.002 $\pm$ 0.006 | 0 - 0.014    | 0           | 0        | 0     | 30  |         |
| <b>6-2FTS</b>  | Urbanized | 0.055 $\pm$ 0.079 | 0 - 0.214    | 0           | 0        | 0.131 | 40  | > 0.05  |
|                | Rural     | 0.025 $\pm$ 0.063 | 0 - 0.274    | 0           | 0        | 0.012 | 45  |         |
| <b>8-2 FTS</b> | Urbanized | 0.061 $\pm$ 0.074 | 0 - 0.213    | 0           | 0.034    | 0.135 | 50  | > 0.05  |
|                | Rural     | 0.032 $\pm$ 0.051 | 0 - 0.188    | 0           | 7.04E-05 | 0.038 | 50  |         |

**Table S5:** PFASs detected in liver of roe deer, comparison between sexes. Data are reported in  $\mu\text{g}\cdot\text{kg}^{-1}$ ;

Detection frequencies (DF%): number of samples &gt; LOQ.

|                | Sex    | Mean $\pm$ SD     | Min - Max     | Percentiles |        |       | DF % | p-value |
|----------------|--------|-------------------|---------------|-------------|--------|-------|------|---------|
|                |        |                   |               | 25th        | Median | 75th  |      |         |
| <b>PFBA</b>    | Female | 0.037 $\pm$ 0.048 | 0 - 0.17      | 0           | 0.004  | 0.064 | 50   | < .001  |
|                | Male   | N.D.              | 0             | 0           | 0      | 0     | 0    |         |
| <b>PFPeA</b>   | Female | 0.031 $\pm$ 0.032 | 0 - 0.068     | 0           | 0.029  | 0.063 | 50   | < .001  |
|                | Male   | N.D.              | 0             | 0           | 0      | 0     | 0    |         |
| <b>PFHpA</b>   | Female | 0.123 $\pm$ 0.128 | 0 - 0.348     | 0           | 0.1    | 0.237 | 60   | 0.002   |
|                | Male   | 0.035 $\pm$ 0.156 | 0 - 0.697     | 0           | 0      | 0     | 10   |         |
| <b>PFOA</b>    | Female | 0.125 $\pm$ 0.111 | 0 - 0.299     | 0.006       | 0.169  | 0.214 | 80   | 0.134   |
|                | Male   | 0.410 $\pm$ 1.194 | 0 - 1844      | 0           | 0.046  | 0.136 | 55   |         |
| <b>PFNA</b>    | Female | 0.424 $\pm$ 0.204 | 0.115 - 0.854 | 0.328       | 0.417  | 0.553 | 100  | 0.376   |
|                | Male   | 0.403 $\pm$ 0.417 | 0 - 1.503     | 0.101       | 0.243  | 0.667 | 90   |         |
| <b>PFDA</b>    | Female | 0.007 $\pm$ 0.012 | 0 - 0.031     | 0           | 0      | 0     | 20   | 0.892   |
|                | Male   | 0.006 $\pm$ 0.012 | 0 - 0.032     | 0           | 0      | 0     | 20   |         |
| <b>PFBS</b>    | Female | 0.163 $\pm$ 0.183 | 0 - 0.612     | 0           | 0.118  | 0.291 | 60   | < .001  |
|                | Male   | N.D.              | 0             | 0           | 0      | 0     | 0    |         |
| <b>PFHxS</b>   | Female | 0.177 $\pm$ 0.194 | 0 - 0.553     | 0           | 0.113  | 0.325 | 50   | 0.003   |
|                | Male   | 0.011 $\pm$ 0.046 | 0 - 0.209     | 0           | 0      | 0     | 10   |         |
| <b>PFOS</b>    | Female | 0.719 $\pm$ 0.273 | 0.264 - 1.215 | 0.576       | 0.713  | 0.877 | 100  | 0.002   |
|                | Male   | 0.613 $\pm$ 0.865 | 0.114 - 3.940 | 0.297       | 0.371  | 0.492 | 100  |         |
| <b>6-2 FTS</b> | Female | 0.066 $\pm$ 0.089 | 0 - 0.335     | 0.024       | 0.034  | 0.049 | 95   | < .001  |
|                | Male   | N.D.              | 0             | 0           | 0      | 0     | 0    |         |
| <b>8-2 FTS</b> | Female | 0.099 $\pm$ 0.085 | 0.026 - 0.359 | 0.048       | 0.071  | 0.099 | 100  | < .001  |
|                | Male   | N.D.              | 0             | 0           | 0      | 0     | 0    |         |

**Table S6:** PFASs detected in muscle of roe deer, comparison between sexes. Data are reported in  $\mu\text{g}\cdot\text{kg}^{-1}$ ;

Detection frequencies (DF%): number of samples &gt; LOQ.

|                | Sex    | Mean $\pm$ SD     | Min -<br>Max | Percentiles |        |       | DF% | p-value |
|----------------|--------|-------------------|--------------|-------------|--------|-------|-----|---------|
|                |        |                   |              | 25th        | Median | 75th  |     |         |
| <b>PFBA</b>    | Female | $0.056 \pm 0.078$ | 0 - 0.277    | 0           | 0.017  | 0.097 | 55  | > 0.05  |
|                | Male   | $0.044 \pm 0.151$ | 0 - 0.679    | 0           | 0      | 0.005 | 25  |         |
| <b>PFPeA</b>   | Female | $0.046 \pm 0.031$ | 0 - 0.108    | 0.033       | 0.059  | 0.066 | 75  | < .001  |
|                | Male   | $0.005 \pm 0.013$ | 0 - 0.044    | 0           | 0      | 0     | 10  |         |
| <b>PFHpA</b>   | Female | $0.130 \pm 0.135$ | 0 - 0.302    | 0           | 0.094  | 0.26  | 50  | < .001  |
|                | Male   | N.D.              | 0            | 0           | 0      | 0     | 0   |         |
| <b>PFOA</b>    | Female | $0.118 \pm 0.116$ | 0 - 0.254    | 0           | 0.131  | 0.238 | 55  | <0.05   |
|                | Male   | $0.019 \pm 0.046$ | 0 - 0.197    | 0           | 0      | 0.009 | 25  |         |
| <b>PFNA</b>    | Female | $0.217 \pm 0.286$ | 0 - 0.121    | 0.004       | 0.175  | 0.342 | 95  | < .001  |
|                | Male   | $0.007 \pm 0.017$ | 0 - 0.063    | 0           | 0      | 0.002 | 30  |         |
| <b>PFDA</b>    | Female | $0.015 \pm 0.015$ | 0 - 0.032    | 0           | 0.014  | 0.029 | 50  | < .001  |
|                | Male   | N.D.              | 0            | 0           | 0      | 0     | 0   |         |
| <b>PFBS</b>    | Female | $0.131 \pm 0.140$ | 0 - 0.355    | 0           | 0.064  | 0.256 | 55  | < .001  |
|                | Male   | N.D.              | 0            | 0           | 0      | 0     | 25  |         |
| <b>PFHxS</b>   | Female | $0.122 \pm 0.131$ | 0 - 0.317    | 0           | 0.071  | 0.25  | 50  | < .001  |
|                | Male   | N.D.              | 0            | 0           | 0      | 0     | 0   |         |
| <b>PFOS</b>    | Female | $0.587 \pm 0.176$ | 0 - 8.019    | 0.011       | 0.301  | 0.366 | 90  | < .001  |
|                | Male   | $0.005 \pm 0.023$ | 0 - 0.106    | 0           | 0      | 0     | 5   |         |
| <b>FOSA</b>    | Female | $0.007 \pm 0.008$ | 0 - 0.019    | 0           | 0      | 0.014 | 45  | < .001  |
|                | Male   | N.D.              | 0            | 0           | 0      | 0     | 0   |         |
| <b>6-2FTS</b>  | Female | $0.074 \pm 0.085$ | 0 - 0.274    | 0.005       | 0.03   | 0.151 | 85  | < .001  |
|                | Male   | N.D.              | 0            | 0           | 0      | 0     | 0   |         |
| <b>8-2 FTS</b> | Female | $0.086 \pm 0.064$ | 0 - 0.213    | 0.036       | 0.046  | 0.14  | 95  | < .001  |
|                | Male   | N.D.              | 0            | 0           | 0      | 0     | 0   |         |



**Table S7:** PFASs detected in liver of roe deer, comparison between age classes. Data are reported in  $\mu\text{g}\cdot\text{kg}^{-1}$ ;

detection frequencies (DF%): number of samples &gt; LOQ.

|                | Age      | Mean $\pm$ SD     | Min - Max     | Percentiles |        |       | DF% | pvalue |
|----------------|----------|-------------------|---------------|-------------|--------|-------|-----|--------|
|                |          |                   |               | 25th        | Median | 75th  |     |        |
| <b>PFBA</b>    | < 2 y.o. | 0.027 $\pm$ 0.045 | 0 - 0.17      | 0           | 0      | 0.059 | 35  | > 0.05 |
|                | > 2 y.o. | 0.009 $\pm$ 0.029 | 0 - 0.119     | 0           | 0      | 0     | 15  |        |
| <b>PFPeA</b>   | < 2 y.o. | 0.022 $\pm$ 0.031 | 0 - 0.068     | 0           | 0      | 0.062 | 35  | > 0.05 |
|                | > 2 y.o. | 0.009 $\pm$ 0.022 | 0 - 0.064     | 0           | 0      | 0     | 15  |        |
| <b>PFHpA</b>   | < 2 y.o. | 0.088 $\pm$ 0.126 | 0 - 0.348     | 0           | 0      | 0.226 | 35  | > 0.05 |
|                | > 2 y.o. | 0.070 $\pm$ 0.169 | 0 - 0.697     | 0           | 0      | 0.008 | 35  |        |
| <b>PFOA</b>    | < 2 y.o. | 0.091 $\pm$ 0.111 | 0 - 0.299     | 0           | 0.016  | 0.209 | 55  | > 0.05 |
|                | > 2 y.o. | 0.446 $\pm$ 0.427 | 0 - 1.844     | 0.018       | 0.129  | 0.192 | 80  |        |
| <b>PFNA</b>    | < 2 y.o. | 0.305 $\pm$ 0.245 | 0 - 0.854     | 0.126       | 0.243  | 0.414 | 100 | <0.05  |
|                | > 2 y.o. | 0.528 $\pm$ 0.358 | 0 - 1         | 0.251       | 0.523  | 0.653 | 100 |        |
| <b>PFDA</b>    | < 2 y.o. | 0.007 $\pm$ 0.013 | 0 - 0.031     | 0           | 0      | 0.007 | 25  | > 0.05 |
|                | > 2 y.o. | 0.005 $\pm$ 0.011 | 0 - 0.032     | 0           | 0      | 0     | 15  |        |
| <b>PFBS</b>    | < 2 y.o. | 0.116 $\pm$ 0.178 | 0 - 0.612     | 0           | 0      | 0.259 | 40  | > 0.05 |
|                | > 2 y.o. | 0.046 $\pm$ 0.114 | 0 - 0.378     | 0           | 0      | 0     | 20  |        |
| <b>PFHxS</b>   | < 2 y.o. | 0.123 $\pm$ 0.182 | 0 - 0.553     | 0           | 0      | 0.296 | 35  | > 0.05 |
|                | > 2 y.o. | 0.065 $\pm$ 0.139 | 0 - 0.460     | 0           | 0      | 0.002 | 25  |        |
| <b>PFOS</b>    | < 2 y.o. | 0.527 $\pm$ 0.268 | 0.114 - 8.019 | 0.355       | 0.484  | 0.622 | 100 | > 0.05 |
|                | > 2 y.o. | 0.805 $\pm$ 0.846 | 0.152 - 3.940 | 0.347       | 0.596  | 0.878 | 100 |        |
| <b>6-2 FTS</b> | < 2 y.o. | 0.029 $\pm$ 0.065 | 0 - 0.291     | 0           | 0      | 0.032 | 45  | > 0.05 |
|                | > 2 y.o. | 0.037 $\pm$ 0.077 | 0 - 0.335     | 0           | 0.011  | 0.033 | 50  |        |
| <b>8-2 FTS</b> | < 2 y.o. | 0.040 $\pm$ 0.063 | 0 - 0.25      | 0           | 0.013  | 0.05  | 50  | > 0.05 |
|                | > 2 y.o. | 0.058 $\pm$ 0.090 | 0 - 0.359     | 0           | 0.024  | 0.082 | 50  |        |

**Table S8:** PFASs detected in muscle of roe deer, comparison between age classes. Data are reported in  $\mu\text{g}\cdot\text{kg}^{-1}$ <sup>1</sup>; detection frequencies (DF%): number of samples > LOQ.

|                | Age Class | Mean $\pm$ SD     | Minimo    | Percentiles |          |          | DF%      | pvalue |
|----------------|-----------|-------------------|-----------|-------------|----------|----------|----------|--------|
|                |           |                   |           | 25th        | Median   | 75th     |          |        |
| <b>PFBA</b>    | < 2 y.o.  | 0.035 $\pm$ 0.057 | 0 - 0.197 | 0           | 0        | 0.058    | 40       | > 0.05 |
|                | > 2 y.o.  | 0.065 $\pm$ 0.159 | 0 - 0.679 | 0           | 0        | 0.041    | 40       |        |
| <b>PFPeA</b>   | < 2 y.o.  | 0.034 $\pm$ 0.034 | 0 - 0.108 | 0           | 0.044    | 0.065    | 55       | > 0.05 |
|                | > 2 y.o.  | 0.016 $\pm$ 0.026 | 0 - 0.069 | 0           | 0        | 0.044    | 30       |        |
| <b>PFHpA</b>   | < 2 y.o.  | 0.090 $\pm$ 0.127 | 0 - 0.302 | 0           | 0        | 0.248    | 35       | > 0.05 |
|                | > 2 y.o.  | 0.041 $\pm$ 0.099 | 0 - 0.288 | 0           | 0        | 0        | 15       |        |
| <b>PFOA</b>    | < 2 y.o.  | 0.079 $\pm$ 0.113 | 0 - 0.254 | 0           | 0        | 0.211    | 35       | > 0.05 |
|                | > 2 y.o.  | 0.058 $\pm$ 0.088 | 0 - 0.254 | 0           | 0        | 0.076    | 45       |        |
| <b>PFNA</b>    | < 2 y.o.  | 0.164 $\pm$ 0.292 | 0 - 0.337 | 0           | 1.00E-03 | 0.337    | 50       | > 0.05 |
|                | > 2 y.o.  | 0.059 $\pm$ 0.121 | 0 - 0.355 | 6.30E-04    | 0.003    | 0.028    | 75       |        |
| <b>PFDA</b>    | < 2 y.o.  | 0.011 $\pm$ 0.015 | 0 - 0.033 | 0           | 0        | 0.029    | 35       | > 0.05 |
|                | > 2 y.o.  | 0.004 $\pm$ 0.011 | 0 - 0.029 | 0           | 0        | 0        | 15       |        |
| <b>PFBS</b>    | < 2 y.o.  | 0.084 $\pm$ 0.123 | 0 - 0.355 | 0           | 0        | 0.218    | 40       | > 0.05 |
|                | > 2 y.o.  | 0.046 $\pm$ 0.113 | 0 - 0.338 | 0           | 0        | 1.00E-03 | 2.50E+01 |        |
| <b>PFHxS</b>   | < 2 y.o.  | 0.080 $\pm$ 0.115 | 0 - 0.296 | 0           | 0        | 0.204    | 35       | > 0.05 |
|                | > 2 y.o.  | 0.042 $\pm$ 0.104 | 0 - 0.317 | 0           | 0        | 0        | 15       |        |
| <b>PFOS</b>    | < 2 y.o.  | 0.529 $\pm$ 0.177 | 0 - 8.019 | 0           | 0.002    | 0.353    | 50       | > 0.05 |
|                | > 2 y.o.  | 0.063 $\pm$ 0.130 | 0 - 0.376 | 0           | 0        | 0.024    | 45       |        |
| <b>FOSA</b>    | < 2 y.o.  | 0.004 $\pm$ 0.006 | 0 - 0.016 | 0           | 0        | 0.012    | 30       | > 0.05 |
|                | > 2 y.o.  | 0.002 $\pm$ 0.006 | 0 - 0.019 | 0           | 0        | 0        | 15       |        |
| <b>6-2FTS</b>  | < 2 y.o.  | 0.022 $\pm$ 0.054 | 0 - 0.182 | 0           | 0        | 0.006    | 40       | > 0.05 |
|                | > 2 y.o.  | 0.051 $\pm$ 0.082 | 0 - 0.274 | 0           | 0        | 0.066    | 45       |        |
| <b>8-2 FTS</b> | < 2 y.o.  | 0.033 $\pm$ 0.055 | 0 - 0.213 | 0           | 0        | 0.037    | 45       | > 0.05 |
|                | > 2 y.o.  | 0.053 $\pm$ 0.069 | 0 - 0.188 | 0           | 0.018    | 0.126    | 55       |        |
